# Supplementary material for: Very Low and High Blood Viscosity are Risk Factors for Internal Flow Choking Causing Asymptomatic Cardiovascular Disease
Source: Research Square preprint supplement (doi:10.21203/rs.3.rs-151850/v2), 2021-09-16
Supplement: Supplementary file 1 [file 1cee7107b2863aa6d4a3819a.pdf]

## SUPPLEMENTARY MATERIALS

**Movie S1:** In silico result demonstrating the boundary layer blockage induced the Sanal flow choking at a critical pressure ratio: [https://youtu.be/eFndUAU\\_m5I](https://youtu.be/eFndUAU_m5I)

**Movie S2:** In vitro result demonstrating the shock wave generation in a viscoelastic tube with vasospasm at a critical pressure ratio: <https://youtu.be/59E6pI3L5Rc>

**Movie S3:** In vitro result demonstrating the internal flow choking and the shock wave generation in a viscoelastic tube with vasospasm at different locations at a different pressure ratio: <https://youtu.be/UQqtpQaUVHg>

## APPENDIX

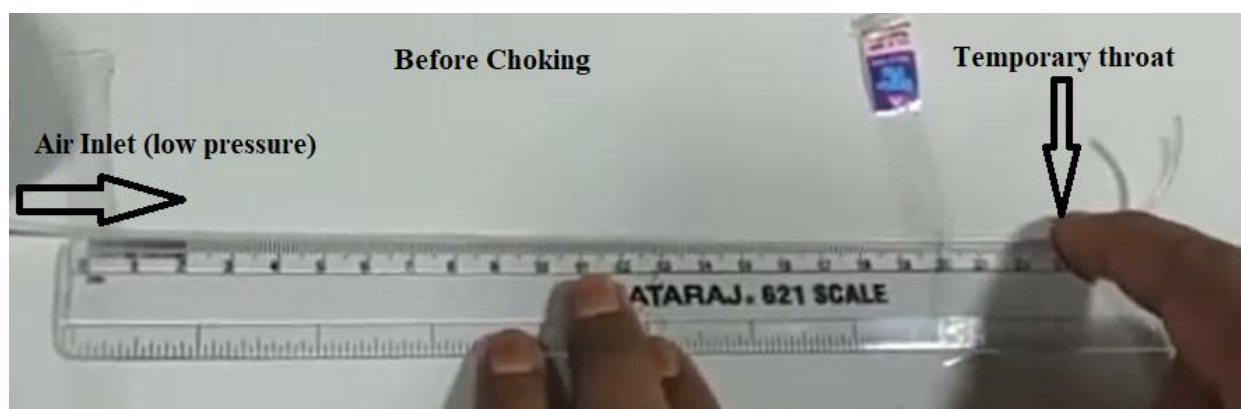

(a)

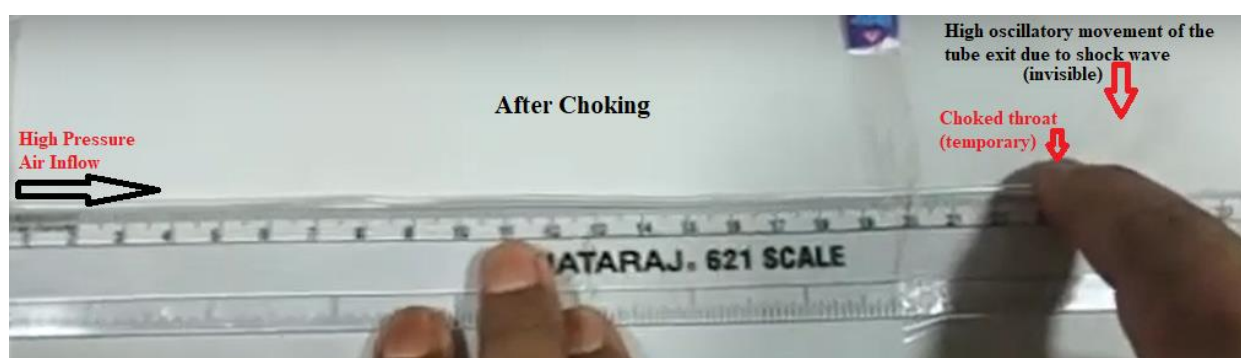

(b)

**Figure A1(a-b). Demonstrating the oscillation of the viscoelastic tube before and after choking due to a temporary throat effect (“Multimedia view” – Movie S2)**

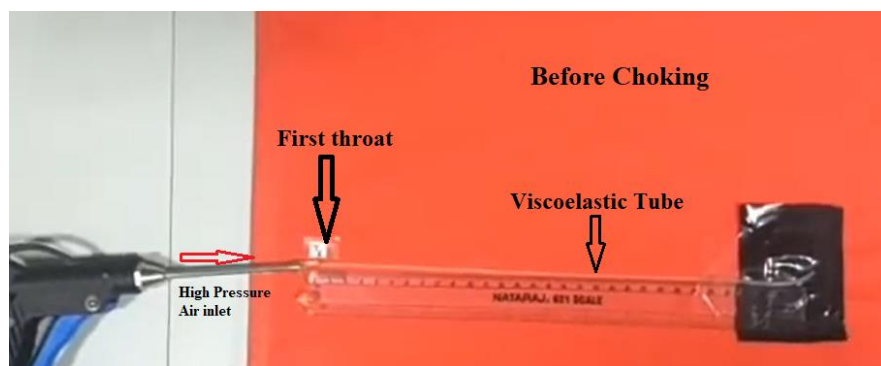

(a)

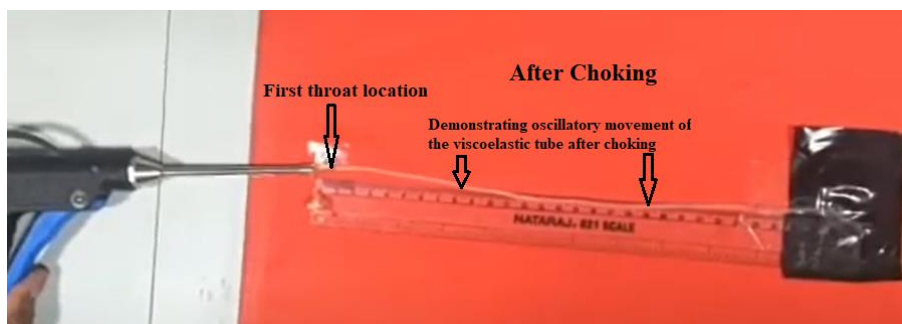

(b)

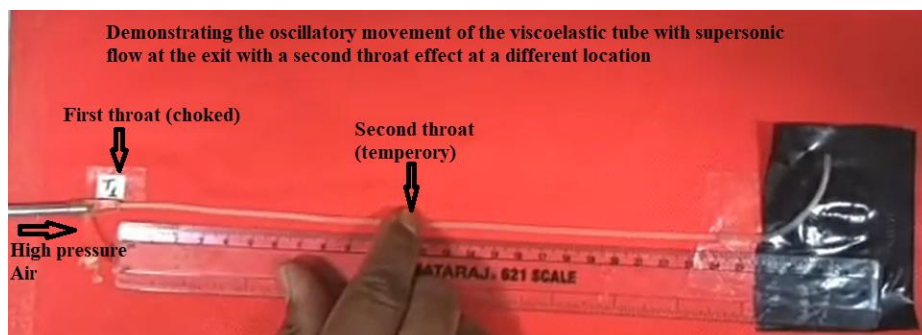

(c)

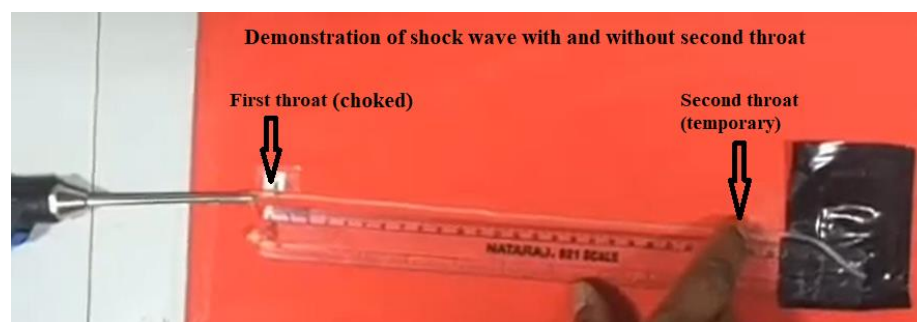

(d)

**Figure A2(a-d). Demonstrating the oscillation of the viscoelastic tube before and after choking with multiple throat effects (“Multimedia view” – Movie S3)**
